## Correction: Characterization of HBV integration patterns and timing in liver cancer and HBV-infected livers

Mayuko Furuta<sup>1</sup>, Hiroko Tanaka<sup>2</sup>, Yuichi Shiraishi<sup>2</sup>, Takuro Uchida<sup>3</sup>, Michio Imamura<sup>3</sup>, Akihiro Fujimoto<sup>1</sup>, Masahi Fujita<sup>1</sup>, Aya Sasaki-Oku<sup>1</sup>, Kazuhiro Maejima<sup>1</sup>, Kaoru Nakano<sup>1</sup>, Yoshiiku Kawakami<sup>3</sup>, Koji Arihiro<sup>4</sup>, Hiroshi Aikata<sup>3</sup>, Masaki Ueno<sup>5</sup>, Shinya Hayami<sup>5</sup>, Shun-Ichi Ariizumi<sup>6</sup>, Masakazu Yamamoto<sup>6</sup>, Kunihito Gotoh<sup>7</sup>, Hideki Ohdan<sup>8</sup>, Hiroki Yamaue<sup>5</sup>, Satoru Miyano<sup>2</sup>, Kazuaki Chayama<sup>3</sup> and Hidewaki Nakagawa<sup>1</sup>

<sup>1</sup> Laboratory for Cancer Genomics, RIKEN Center for Integrative Medical Sciences, Tokyo 108-8639, Japan

<sup>2</sup> Laboratory of DNA Information Analysis, Human Genome Center, The Institute of Medical Science, The University of Tokyo, Tokyo 108-8639, Japan

<sup>3</sup> Department of Gastroenterology and Metabolism, Institute of Biomedical and Health Sciences, Hiroshima University, Hiroshima 734-8551, Japan

<sup>4</sup> Department of Anatomical Pathology, Institute of Biomedical and Health Sciences, Hiroshima University, Hiroshima 734-8551, Japan

<sup>5</sup> Second Department of Surgery, Wakayama Medical University, Wakayama 641-8510, Japan

<sup>6</sup> Department of Gastroenterological Surgery, Tokyo Women's Medical University, Tokyo 162-8666, Japan

<sup>7</sup> Department of Surgery, Osaka International Cancer Institute, Osaka 537-8511, Japan

<sup>8</sup> Department of Gastroenterological Surgery, Institute of Biomedical and Health Sciences, Hiroshima University, Hiroshima 734-8551, Japan

**Published:** August 03, 2018

**Copyright:** Furuta et al. This is an open-access article distributed under the terms of the Creative Commons Attribution License 3.0 (CC BY 3.0), which permits unrestricted use, distribution, and reproduction in any medium, provided the original author and source are credited.

**This article has been corrected:** The correct author name is given below:

### Takuro Uchida

Original article: Oncotarget. 2018; 9:25075-25088. <https://doi.org/10.18632/oncotarget.25308>
